# Supplementary material for: Layered MoS2–graphene composites for biosensor applications with sensitive electrochemical performance
Source: Royal Society of Chemistry journal article supplement (doi:10.1039/c6ay00959j), 2016-01-01
Supplement: c6ay00959j1.pdf [file c6ay00959j1.pdf]

## Supplemental Information

### Layered MoS<sub>2</sub>-graphene composites for biosensor applications with sensitive electrochemical performance

Kunjie Zhang,<sup>a</sup> Hong Sun<sup>\*a</sup> and Shifeng Hou<sup>b</sup>

<sup>a</sup> Institute of Multifunctional Materials (IMM), Laboratory of New Fiber Materials and Modern Textile, College of Materials Science and Engineering, Qingdao University, Qingdao 266071, China.

<sup>b</sup> Department of Chemistry, Shandong University, Jinan 250100, China.

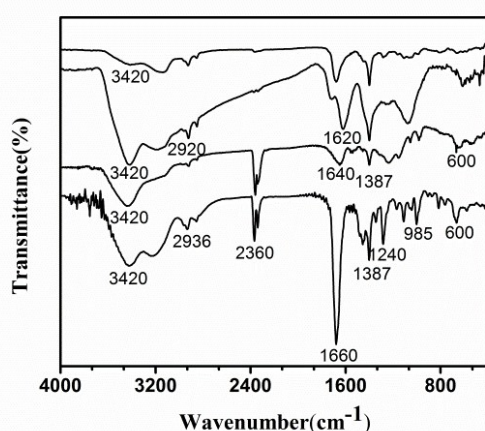

**Fig. S1** FT-IR spectra of (a) MoS<sub>2</sub>, (b) graphene, (c) layered MoS<sub>2</sub>-graphene film, and (d) layered Mb/MoS<sub>2</sub>-graphene/Nafion composite film.

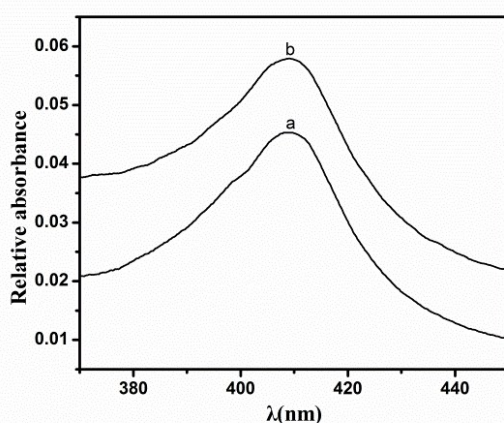

**Fig. S2** UV-vis spectroscopy of (a) dry Mb film, and (b) dry layered Mb/MoS<sub>2</sub>-graphene/Nafion film in pH 7.0 buffers.

\*Corresponding author. Tel: +86-532-83780323; Fax: +86-532-85955529.

E-mail: sun\_hong@qdu.edu.cn (H. Sun).

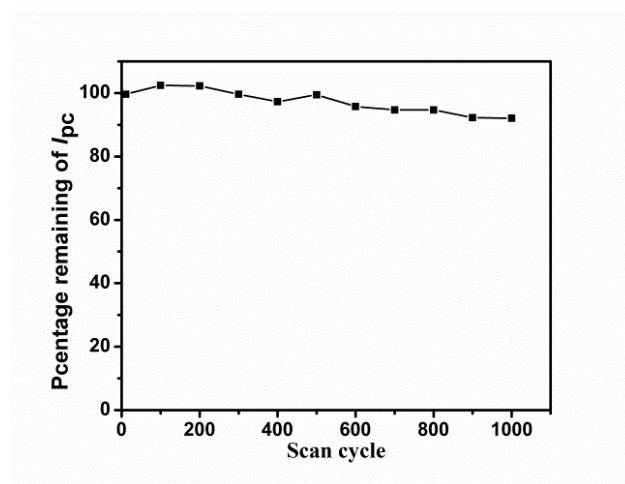

**Fig. S3** The influence of the scan cycle numbers on the CV reduction peak current  $I_{pc}$  for the layered Mb/MoS<sub>2</sub>-graphene/Nafion films at a scan rate of 0.1 V s<sup>-1</sup> in pH 7.0 buffers.

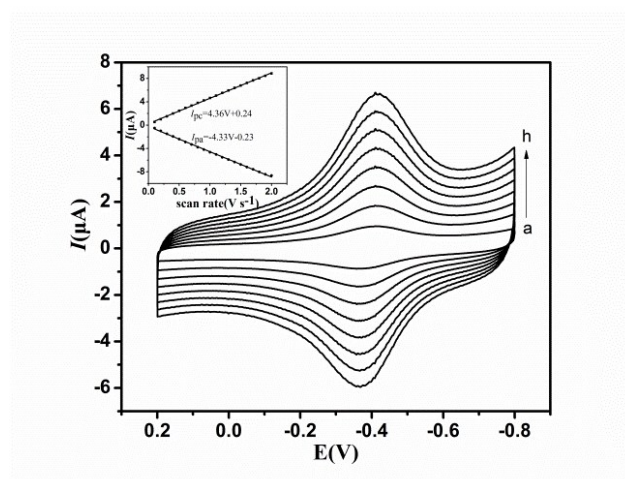

**Fig. S4** CVs of layered Mb/MoS<sub>2</sub>-graphene/Nafion films in pH 7.0 buffers with different scan rates (a to h: 0.1, 0.2, 0.3, 0.4, 0.5, 0.6, 0.7, 0.8 V s<sup>-1</sup>). Insert is the relationship of anodic and cathodic peak currents versus scan rate.

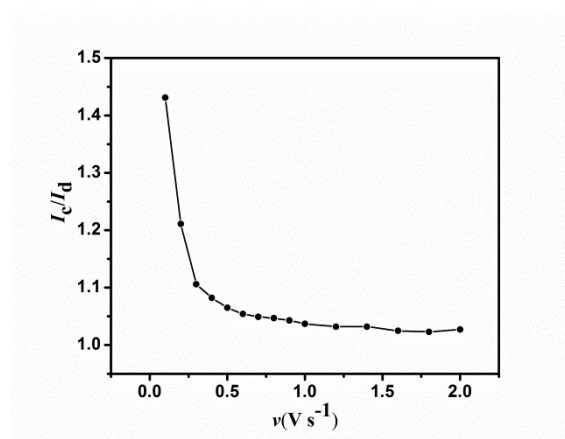

**Fig. S5** Influence of scan rate on catalytic efficiency,  $I_c/I_d$ , for layered Mb/MoS<sub>2</sub>-graphene/Nafion film in 8 mL pH 7.0 buffers, where  $I_d$  is the CV reduction peak current in buffer without oxygen and  $I_c$  is the CV reduction peak current with 40 mL of air injected.

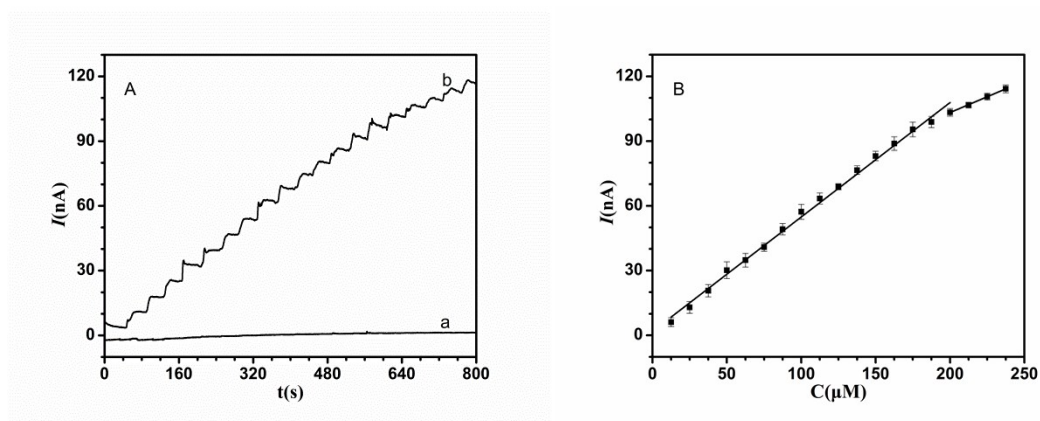

**Fig. S6** Plot A: Amperometric response of (a) layered MoS<sub>2</sub>-graphene/Nafion film, and (b) layered Mb/MoS<sub>2</sub>-graphene/Nafion film at -0.1 V in pH 7.0 buffer solution with 10 μM H<sub>2</sub>O<sub>2</sub> injected every 40 s. Plot B shows the calibration curve of amperometric currents and the concentrations of H<sub>2</sub>O<sub>2</sub>.

S7 RSD was calculated as following:

$$RSD = \frac{\sqrt{\frac{\sum_{i=1}^n (X_i - \bar{X})^2}{n-1}}}{\bar{X}} \times 100\%$$

$X_i = 0.58, 0.60, 0.61, 0.59, 0.61 \mu A$

$$\bar{X} = \frac{\sum_{i=1}^n X_i}{n}$$

**Table S1** The electrochemical parameters for different Mb-films on GCE

| Film                                         | $\Delta E_p/mV$ | $I_{pc}/\mu A$ | $E^0/V$ vs SCE | $\Gamma^*/mol\ cm^{-2}$ | $\Gamma^*/\Gamma^0\%$ |
|----------------------------------------------|-----------------|----------------|----------------|-------------------------|-----------------------|
| Mb/graphene/Nafion                           | 61              | 0.70           | -0.37          | $5.09 \times 10^{-11}$  | 1.29%                 |
| Mb/MoS <sub>2</sub> /Nafion                  | 60              | 0.79           | -0.37          | $6.84 \times 10^{-11}$  | 1.73%                 |
| Layered Mb/MoS <sub>2</sub> -graphene/Nafion | 52              | 1.06           | -0.38          | $9.00 \times 10^{-11}$  | 2.27%                 |

$E^0$ : the formal potential estimated as the midpoint of reduction and oxidation peak potentials;  $\Delta E_p = E_{pa} - E_{pc}$ : the separation between the anodic and the cathodic peak potentials;  $I_{pc}$ : the cathodic peak current;  $\Gamma^*$ : the surface concentration of electroactive Mb in different Mb-film. These data were estimated by CVs in pH 7.0 buffers at a scan rate of 0.2 V s<sup>-1</sup>.
